# Supplementary material for: Bifunctionalized Silver Nanoparticles as Hg2+ Plasmonic Sensor in Water: Synthesis, Characterizations, and Ecosafety
Source: PubMed Central journal article supplement (PMC6835846; doi:10.3390/nano9101353), 2019-09-20
Supplement: nanomaterials-09-01353-s001.pdf [file nanomaterials-09-01353-s001.pdf]

## Supplementary Material

# Bifunctionalized Silver Nanoparticles as Hg<sup>2+</sup> Plasmonic Sensor in Water: Synthesis, Characterizations, and Ecosafety

Paolo Proposito <sup>1,2</sup>, Luca Burratti <sup>1</sup>, Arianna Bellingeri <sup>3</sup>, Giuseppe Protano <sup>3</sup>, Claudia Faleri <sup>4</sup>, Iliaria Corsi <sup>3</sup>, Chiara Battocchio <sup>5</sup>, Giovanna Iucci <sup>5</sup>, Luca Tortora <sup>5,6</sup>, Valeria Secchi <sup>5</sup>, Stefano Franchi <sup>7</sup> and Iole Venditti <sup>5,\*</sup>

<sup>1</sup> Department of Industrial Engineering and INSTM, University of Rome Tor Vergata, via del Politecnico 1, 00133 Rome, Italy; paolo.proposito@uniroma2.it (P.P.); luca.burratti@uniroma2.it (L.B.)

<sup>2</sup> Center for Regenerative Medicine, University of Rome Tor Vergata, Via Montpellier 1, 00133 Rome, Italy

<sup>3</sup> Department of Physical, Earth and Environmental Sciences, University of Siena, Via Mattioli 4, 53100 Siena, Italy; arianna.bellingeri@student.unisi.it (A.B.); giuseppe.protano@unisi.it (G.P.); ilaria.corsi@unisi.it (I.C.)

<sup>4</sup> Department of Life Sciences, via Mattioli 4, 53100 Siena, Italy; faleric@unisi.it

<sup>5</sup> Department of Sciences, Roma Tre University of Rome, Via della Vasca Navale 79, 00146 Rome, Italy; chiara.battocchio@uniroma3.it (C.B.); giovanna.iucci@uniroma3.it (G.I.); luca.tortora@uniroma3.it (L.T.); valeria.secchi@uniroma3.it (V.S.)

<sup>6</sup> Surface Analysis Laboratory INFN Roma Tre, via della Vasca Navale 84, 00146 Rome, Italy

<sup>7</sup> Elettra-Sincrotrone Trieste S.c.p.A., Strada statale 14, km 163.5, 34149 Basovizza Trieste, Italy; stefano.franchi@elettra.eu

\* Correspondence: iole.venditti@uniroma3.it; Tel.: +39-06-5733-3388

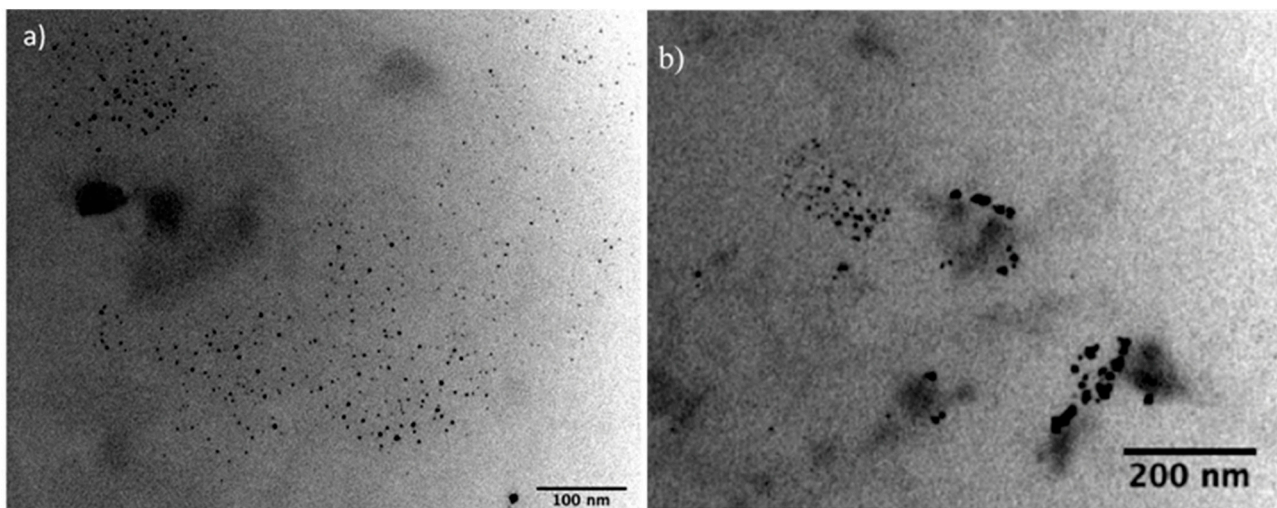

Figure S1: TEM images of bifunctionalized AgNPs at different magnifications.

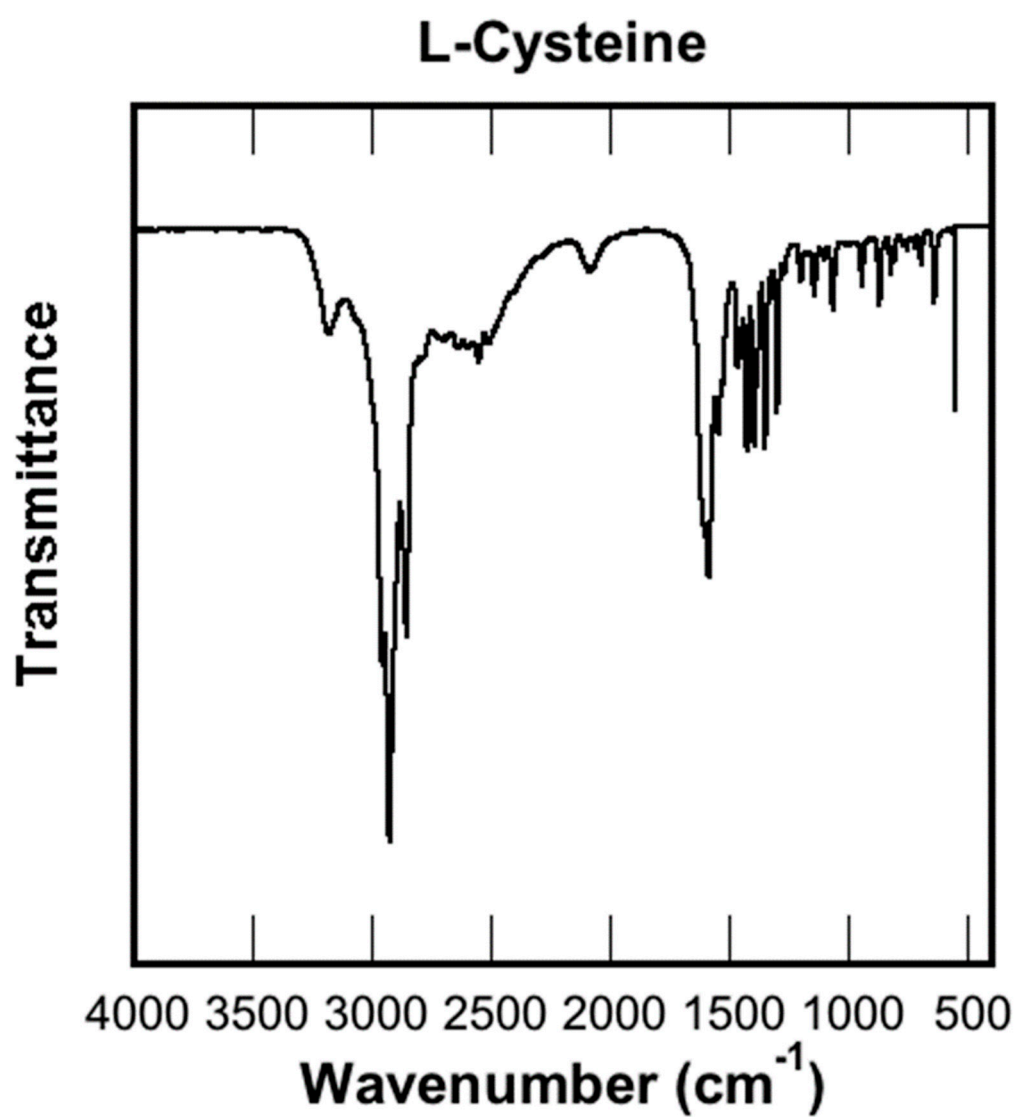

Figure S2: L-Cys FTIR spectrum.

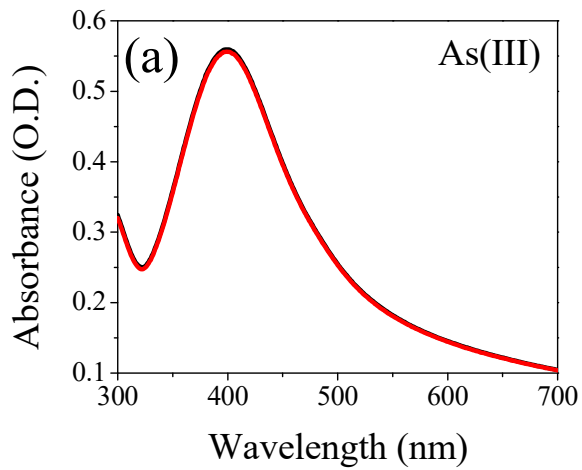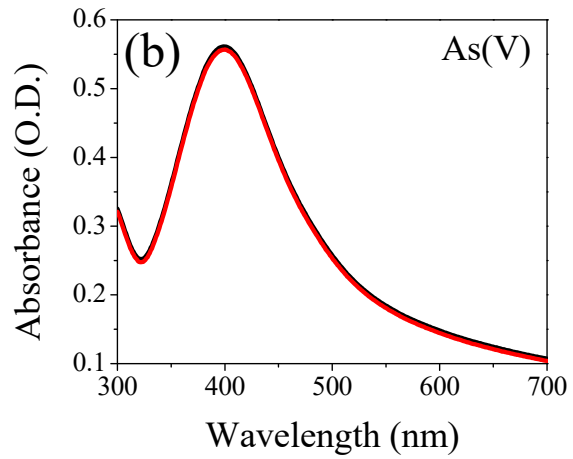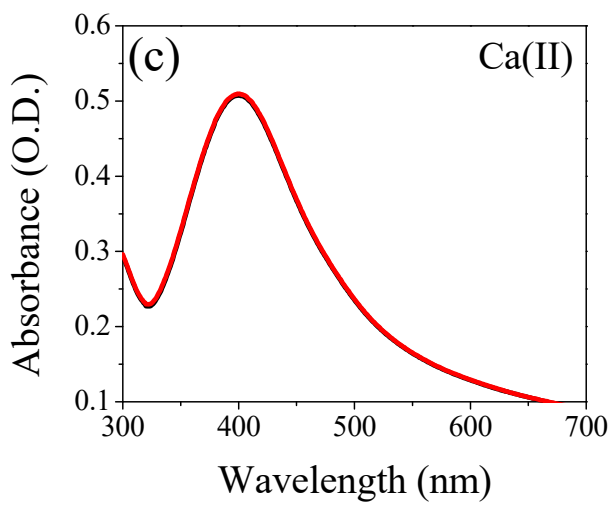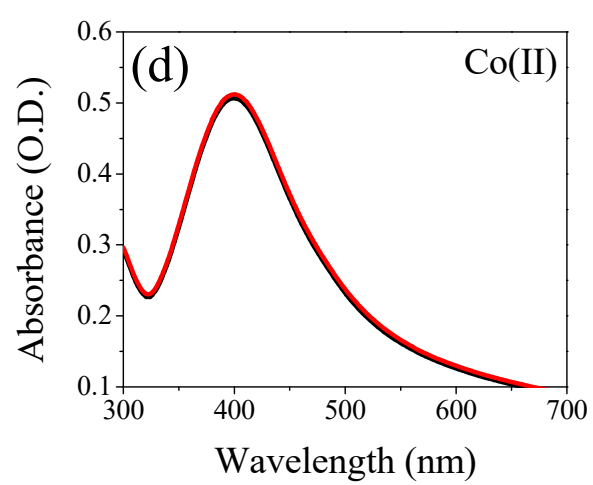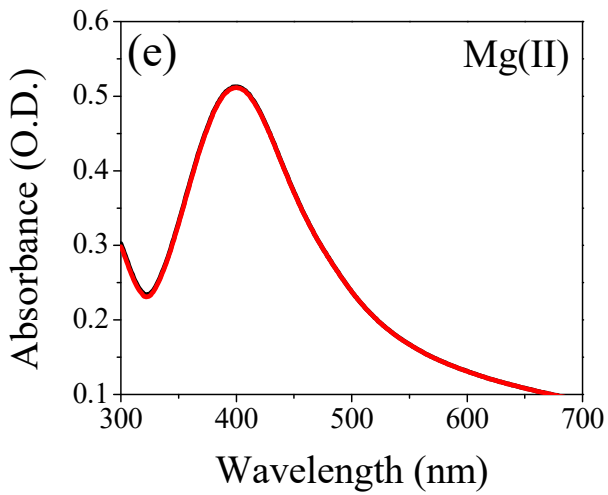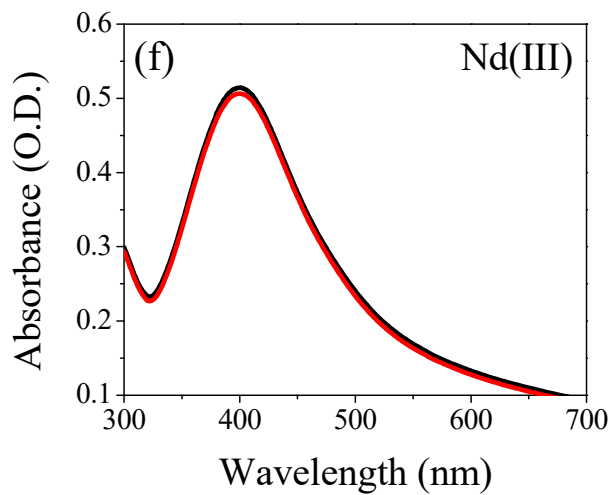

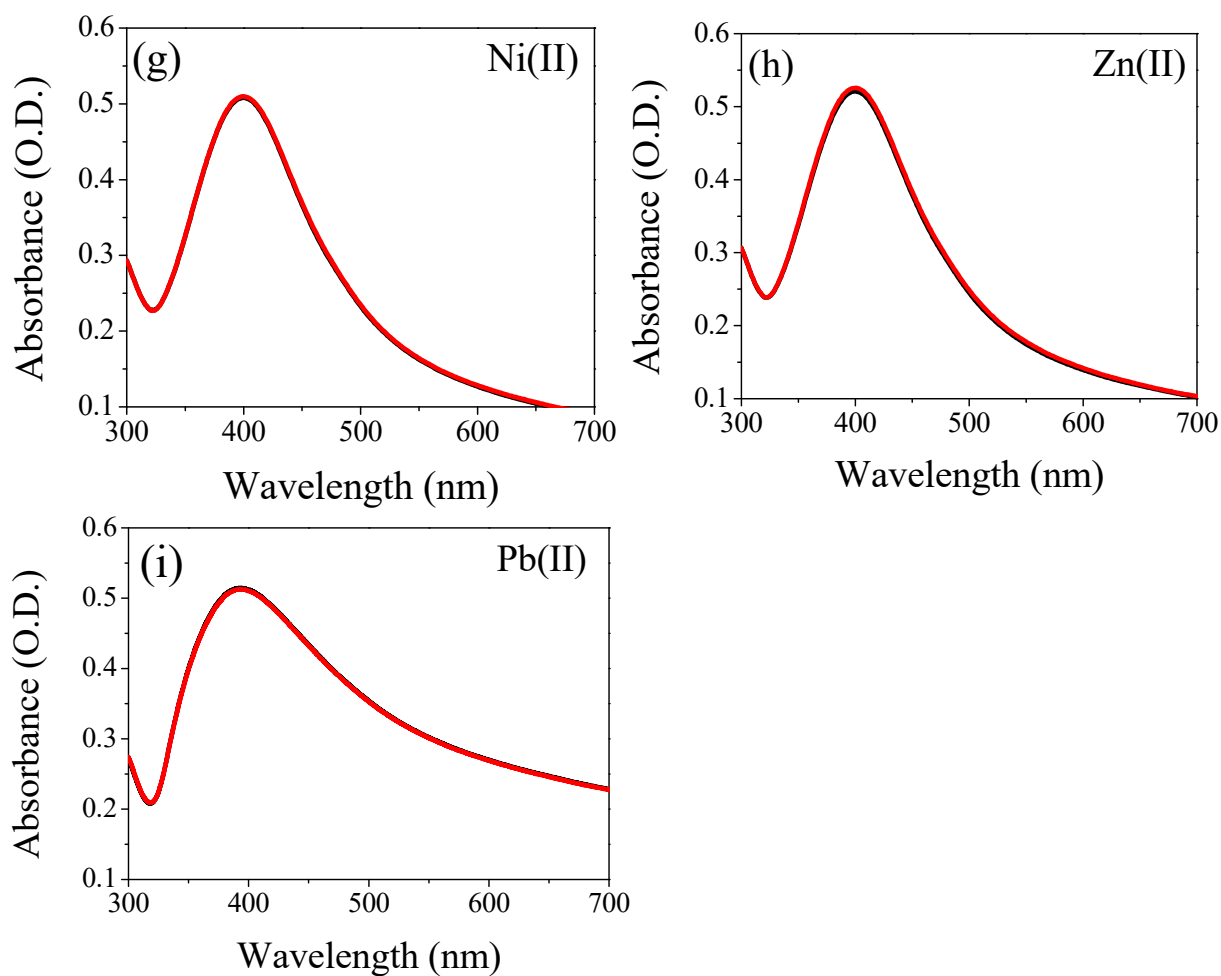

**Figure S3.** Uv-Vis spectra of AgNPs in presence of 2.5 ppm of metal ions ( $As^{3+}$ ,  $As^{5+}$ ,  $Ca^{2+}$ ,  $Co^{2+}$ ,  $Mg^{2+}$ ,  $Nd^{3+}$ ,  $Ni^{2+}$ ,  $Zn^{2+}$ ,  $Pb^{2+}$ ) in water; all references curves (AgNPs alone) are in black line, while red curves represent the interaction between AgNPs and metal ions.

**Table S1.** Table XPS: BE, FWHM, Atomic Ratio values and proposed assignments for all measured core-level signals.

| Signal | BE (eV) | FWHM (eV) | Atomic Ratio (%) | Assignment                   |
|--------|---------|-----------|------------------|------------------------------|
| C1s    | 285.00  | 1.33      | -                | C-C                          |
|        | 286.46  | 1.33      | 47.9             | C-S; C-N; C-O                |
|        | 288.45  | 1.33      | 52.1             | COOH                         |
| N1s    | 400.24  | 2.44      | 100.0            | NR3                          |
| O1s    | 532.00  | 1.67      | 41.0             | C=O                          |
|        | 533.00  | 1.67      | 59.0             | O-H                          |
|        | 534.42  | 1.67      | -                | Physisorbed H <sub>2</sub> O |
| S2p    | 161.05  | 0.95      | 54.4             | S-Ag sp                      |
|        | 162.09  | 0.95      | 45.6             | S-Ag sp <sup>3</sup>         |
| Ag3d   | 368.08  | 0.96      | 92.0             | Ag(0)                        |
|        | 369.20  | 0.96      | 8.0              | Ag( $\delta^+$ )             |
| Hg4f   | 100.10  | 0.93      | 83.7             | Hg(0)                        |
|        | 100.85  | 0.93      | 16.3             | Hg(2+)                       |
